# Supplementary material for: Omphalocele minor in a neonate with fistulation: A Case Report and insights on management from a systematic review of case reports
Source: Research Square preprint supplement (doi:10.21203/rs.3.rs-8904297/v1), 2026-02-24
Supplement: Supplementary file 1 [file 71d3147c9f75d7cb75808219.docx]

Supplementary file 01: Search Strategy

| Pubmed |  |  |
| --- | --- | --- |
|  | (“exomphalos” OR “omphalocoele” OR “omphalocele”) AND  (“Meckel” OR “fistula” OR “vitelline” OR “vitello” OR “omphalomesenteric” OR "vitellointestinal") | 170 |
| BMJ case reports |  |  |
|  | (“exomphalos” OR “omphalocoele” OR “omphalocele”) AND  (“Meckel” OR “fistula” OR “vitelline” OR “vitello” OR “omphalomesenteric” OR "vitellointestinal") | 6 |
| International Journal of Surgery Case Reports |  |  |
|  | (“exomphalos” OR “omphalocoele” OR “omphalocele”) AND  (“Meckel” OR “fistula” OR “vitelline” OR “vitello” OR “omphalomesenteric” OR "vitellointestinal") | 11 |
| Journal of surgical case reports |  |  |
|  | (“exomphalos” OR “omphalocoele” OR “omphalocele”) | 1 |
| Taylor&Francis |  |  |
|  | (“exomphalos” OR “omphalocoele” OR “omphalocele”) AND  (“Meckel” OR “fistula” OR “vitelline” OR “vitello” OR “omphalomesenteric” OR "vitellointestinal") | 309 |
| Web Of Science |  |  |
|  | (“exomphalos” OR “omphalocoele” OR “omphalocele”) AND  (“Meckel” OR “fistula” OR “vitelline” OR “vitello” OR “omphalomesenteric” OR "vitellointestinal") | 176 |
